# Supplementary material
Source: MDPI journal article supplement (https://www.mdpi.com/1660-4601/19/18/11148)
Supplement: s1 [file s1]

Archive with 1 entries (1 files):
- COMPLETE IJERPH Supplementary Material_Horgan et al CTM 25.11.22.pdf
